# Supplementary material for: SOX4 Mediates ATRA-Induced Differentiation in Neuroblastoma Cells
Source: MDPI journal article supplement (doi:10.3390/cancers14225642), 2022-11-17
Supplement: s1 [file s1]

Fig 2C

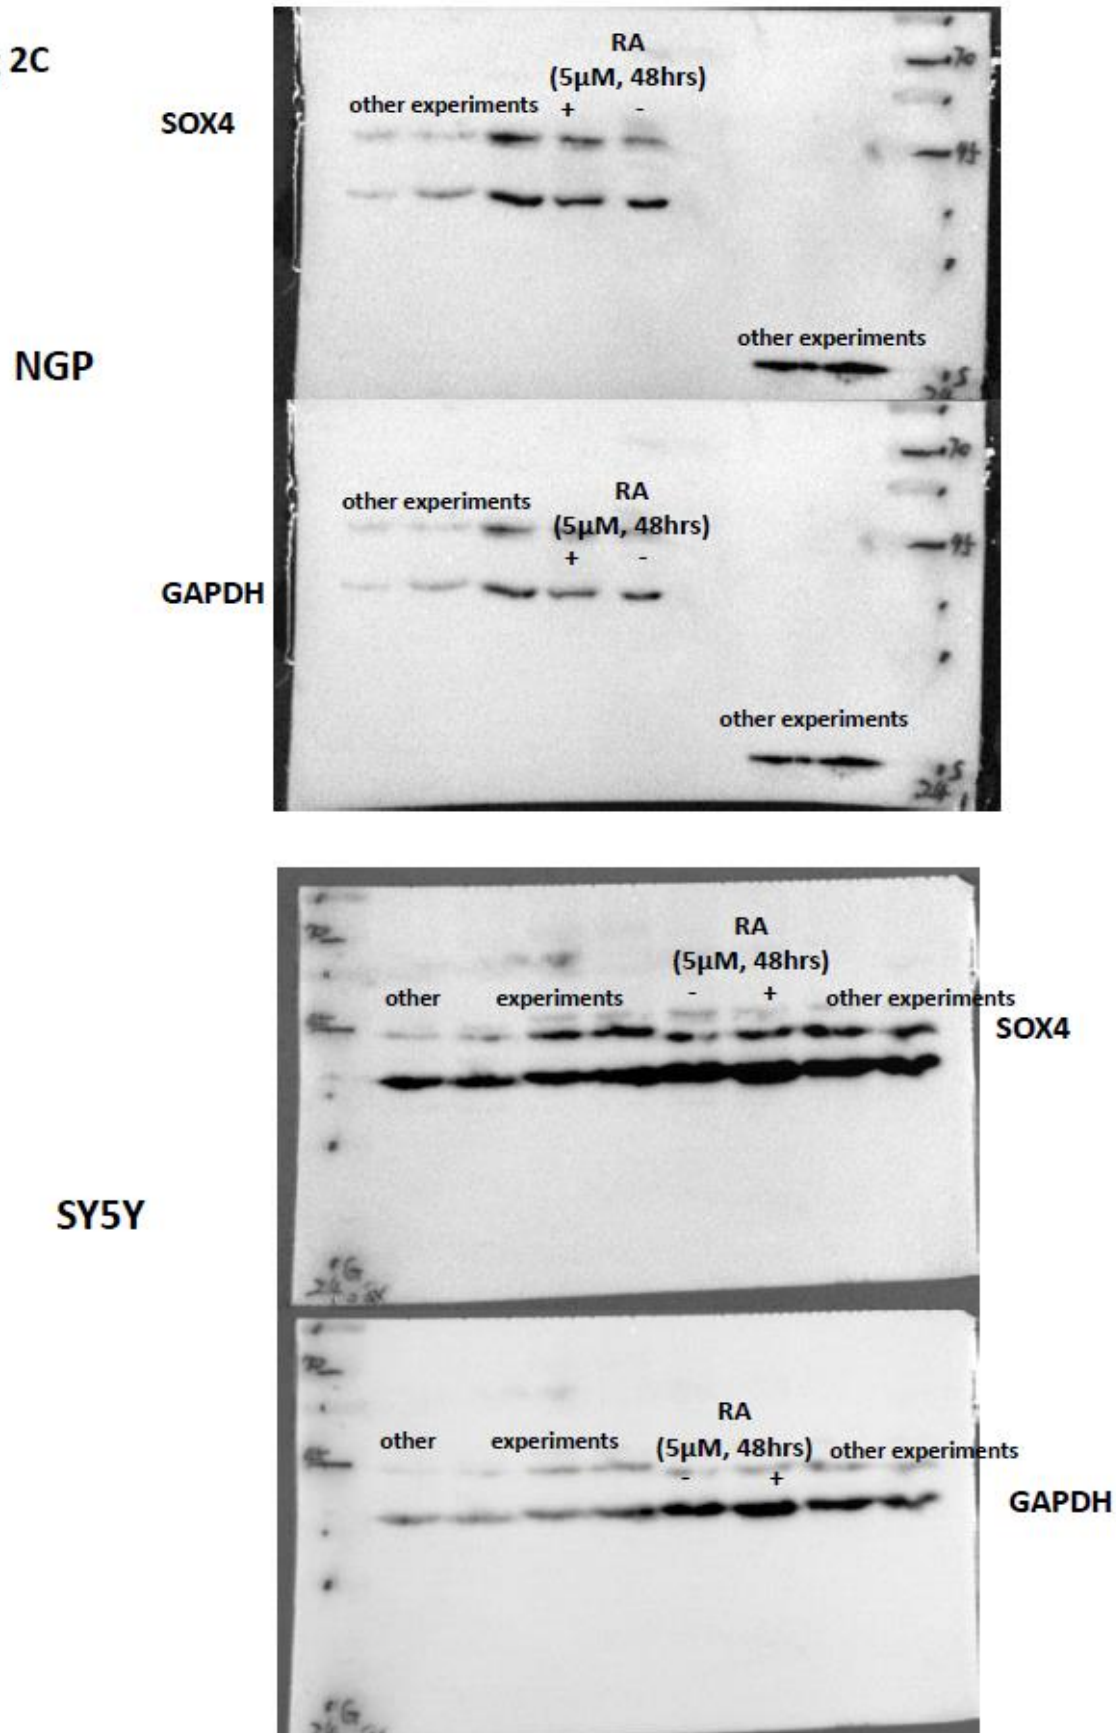

Figure S3. Uncropped western blot of Figure 2C.

**Fig 4A**

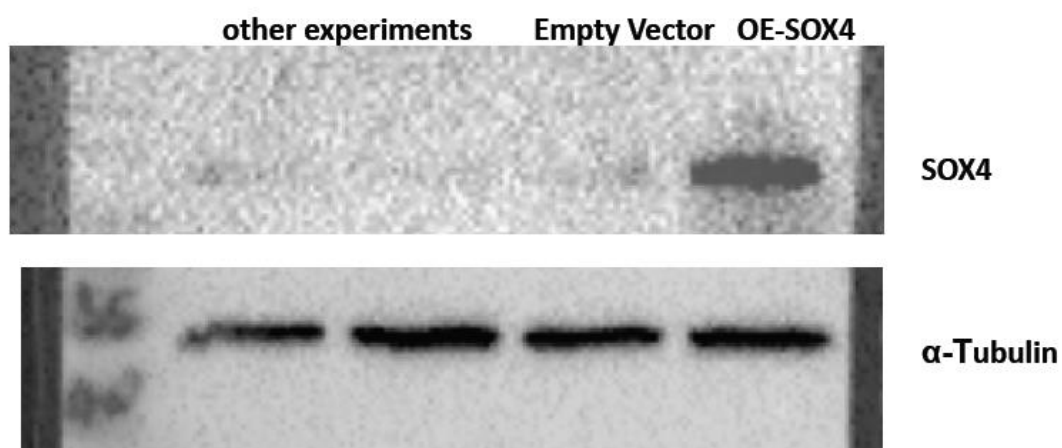

**Figure S4.** Uncropped western blot of Figure 4A.

**Fig 5A**

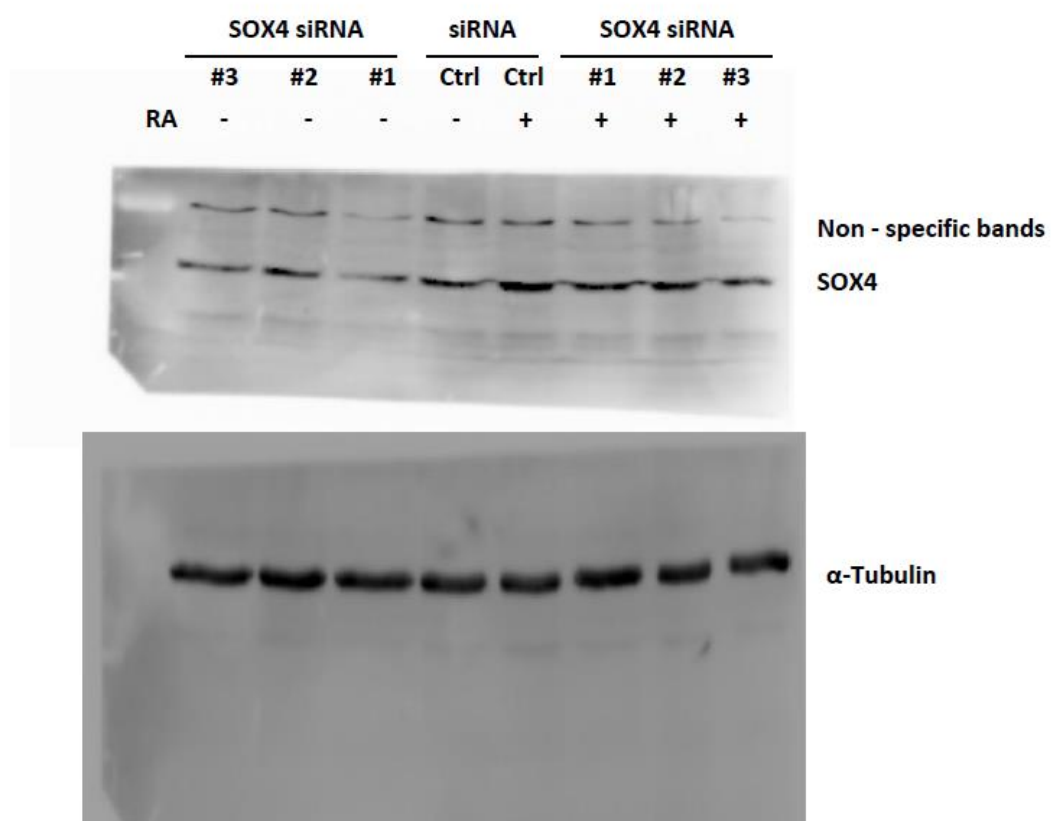

**Figure S5.** Uncropped western blot of Figure 5A.
